# Supplementary material
Source: Springer Nature journal article supplement (https://www.springermedizin.de/resource/supplementary/12913_2010_1485_MOESM3_ESM.pdf/9528258)

Fasting Plasma Glucose (mmol/l)

20

15

10

5

7 to 10.9 mmol/l at treatment start

≥ 11 mmol/l at treatment start

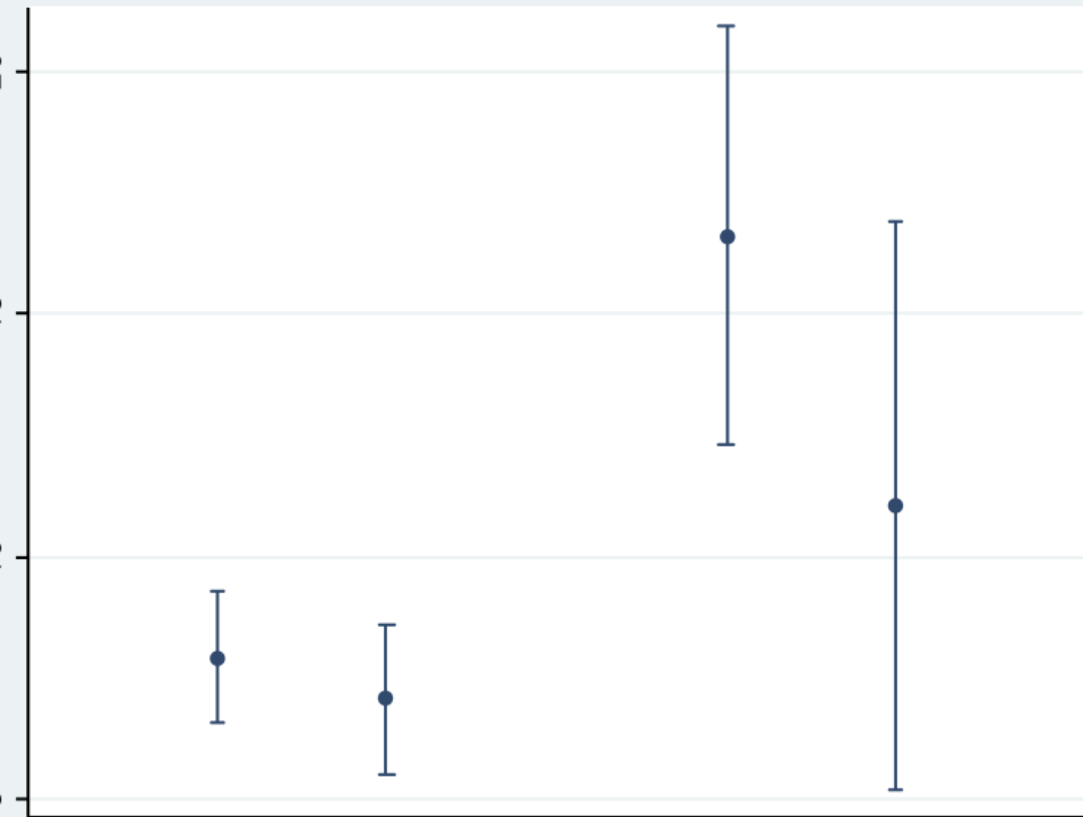

Supplement: MOESM3 [file 9528258]
